# Supplementary material for: Antisense oligonucleotide treatment rescues UBE3A expression and multiple phenotypes of an Angelman syndrome mouse model
Source: JCI journal article supplement (doi:10.1172/jci.insight.145991), 2021-08-09
Supplement: sd1 [file 1]

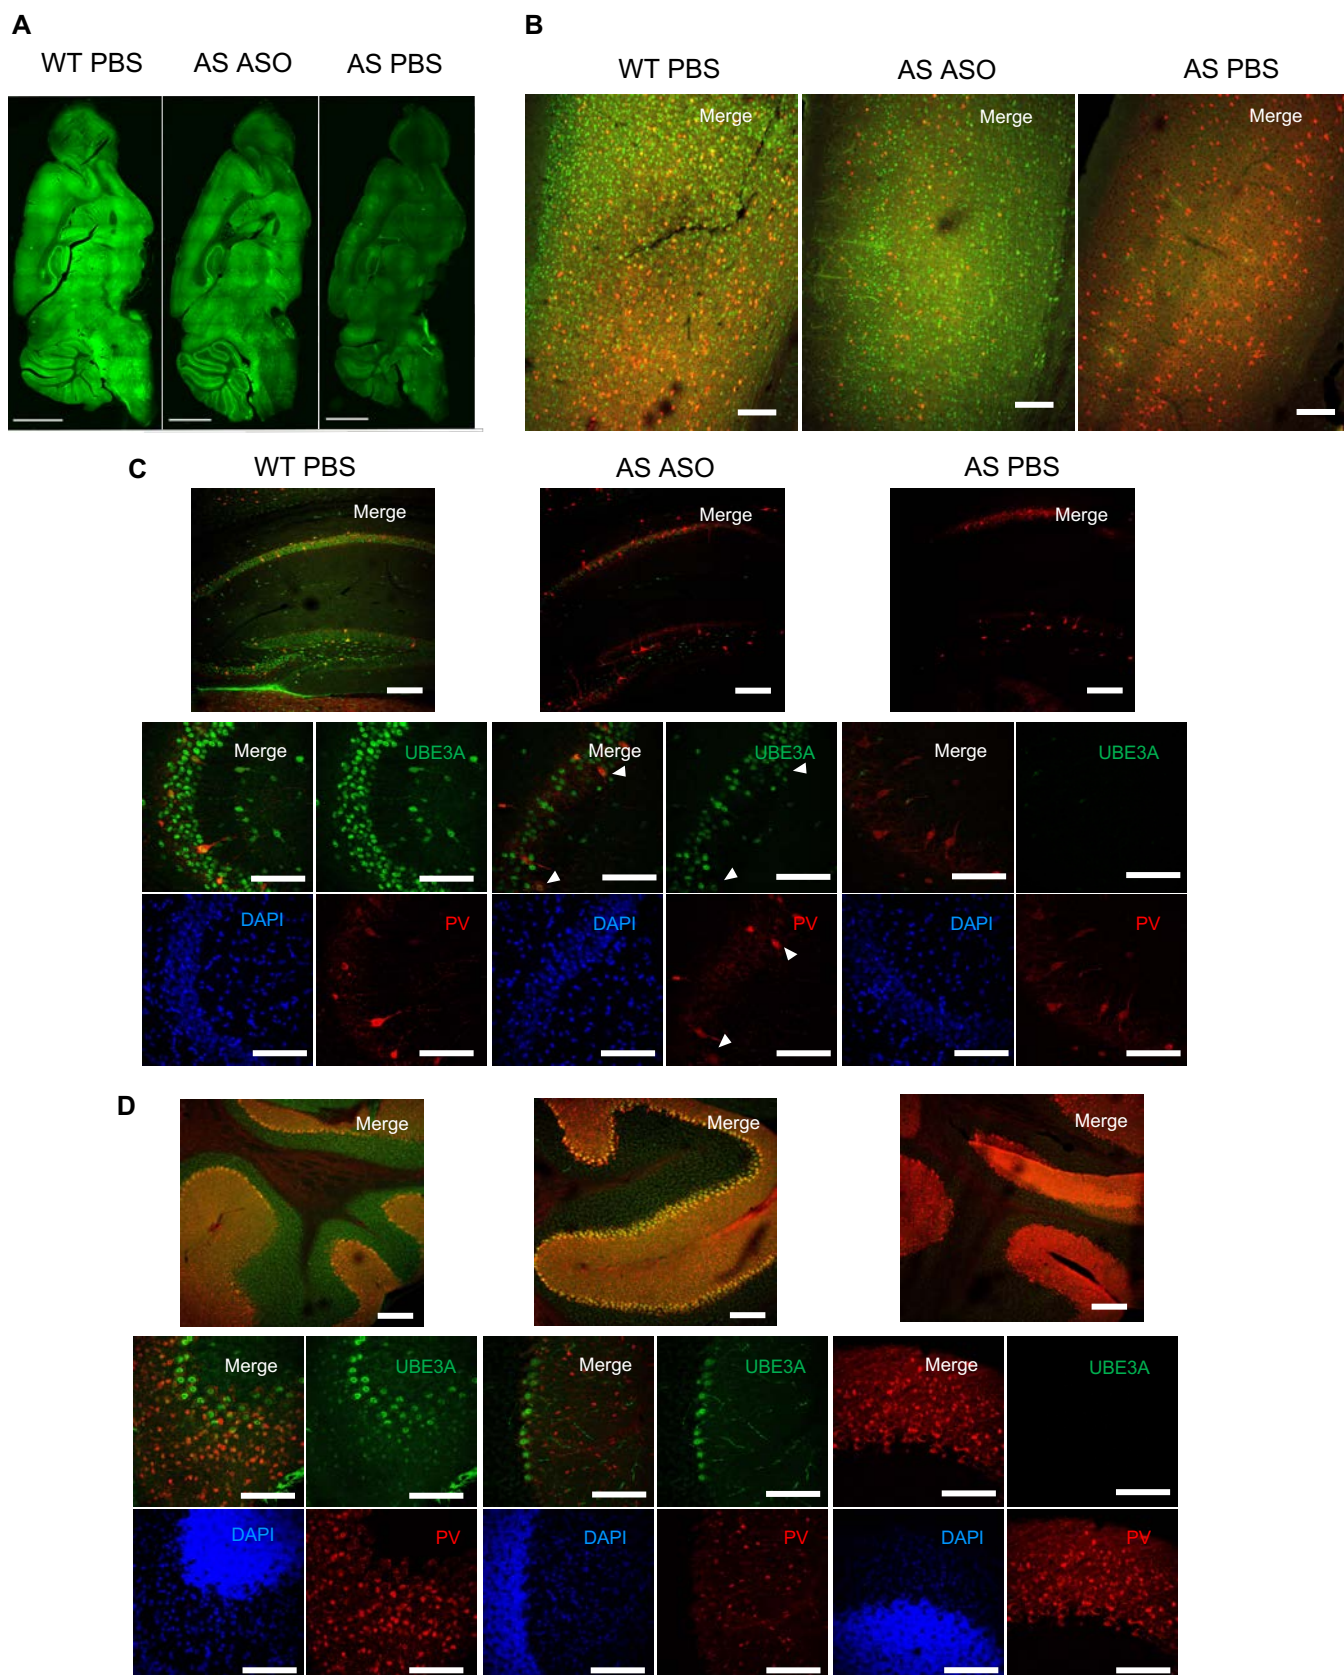

**Supplemental Figure 1: Reinstatement of UBE3A in AS mice injected with the ASO at P1 is not limited to glutamatergic neurons.** Four weeks post-P1 injection the brains (n=2) of WT-PBS, AS-ASO and AS-PBS injected mice were stained for UBE3A (green). (A) The brain of AS mice treated with ASO shows wide spread UBE3A reinstatement compared to the untreated AS brain. (B-D) the cortex (B) hippocampus (C) and cerebellum (D) of WT-PBS, AS-ASO and AS-PBS mice were stained for UBE3A (green), for parvalbumin (PV) (red) and counterstained for DAPI (blue). Scale bars, 2000  $\mu$ m (A), 200  $\mu$ m (B), top panel 200  $\mu$ m, lower two panels 100  $\mu$ m (C-D). Arrows point at cells positive for both parvalbumin and UBE3A.

**A**

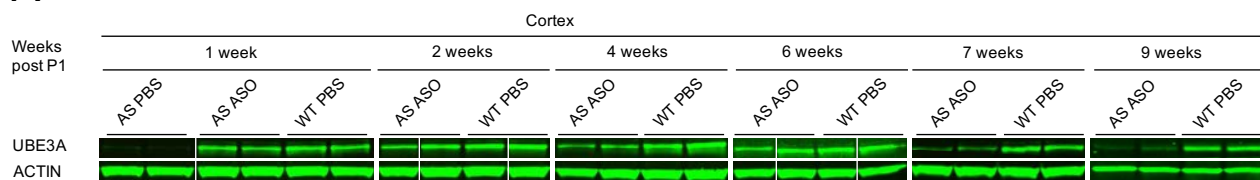

**B**

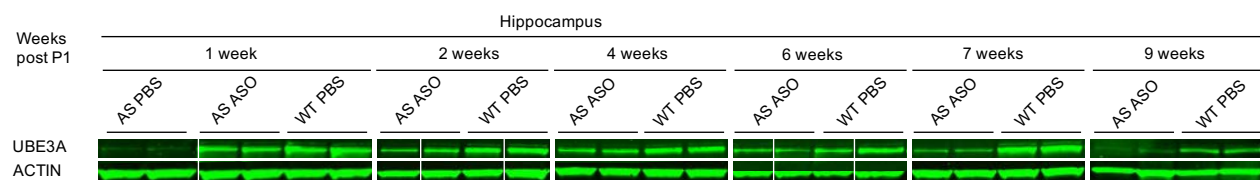

**Supplemental Figure 2: ASO successfully restores UBE3A in the brain of P1 injected AS mice.**

Brains of ASO treated AS mice were used for Western Blot analysis at different time points: 1 week after P1 injection (n=7), 2 (n=3), 4 (n=3), 6 (n=2) and 7 (n=4) weeks after P1 injection. AS-PBS (n=2) and WT (n=3) littermates were used as controls. The thin white vertical lines separating bands indicate noncontiguous lanes that were run on the same gel. UBE3A can be detected at 100kDa and actin, used as loading control, at 45kDa.

**A**

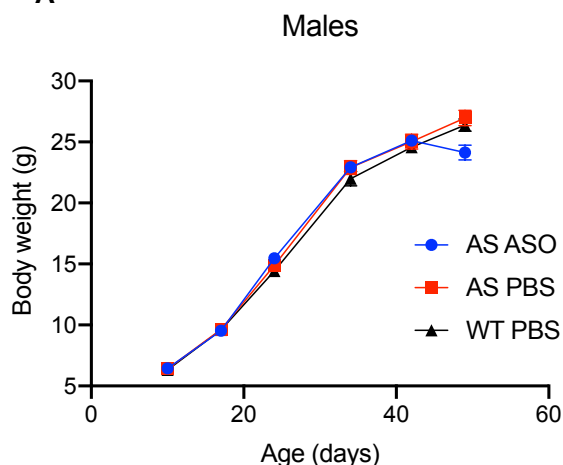

**B**

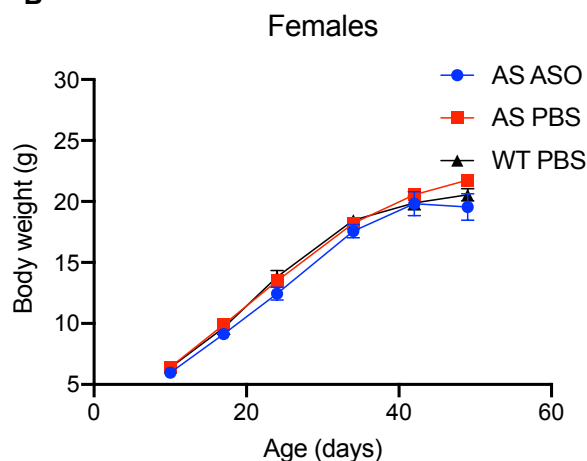

**Supplemental Figure 3: Body weight does not change among groups.** The body weight of AS ASO, WT PBS and AS PBS treated mice is noted at different ages, over the course of 49 days. A. Body weight of males only (AS ASO :10 and 17 days n=10; 24, 34 and 42 days n=9; 49d n= 4. WT PBS: 10, 24 and 42 days n=13; 17d n=12; 34 days n=10; 49d n= 4. AS PBS: 10, 24, and 42 days n=11; 17d n=7; 34d n=10; 49d n= 4). B. Body weight of females only (AS ASO: 10d n=9; 17, 24, 34, and 42 days n=10; 49d n=4. WT PBS: 10, 24 and 42 days n=7; 17d n=5; 34d n=4; 49d n=5. AS PBS:10, 24, and 42 days n=7;17 and 34 days n=4; 49d n=5). Data is represented as means  $\pm$  SEM.

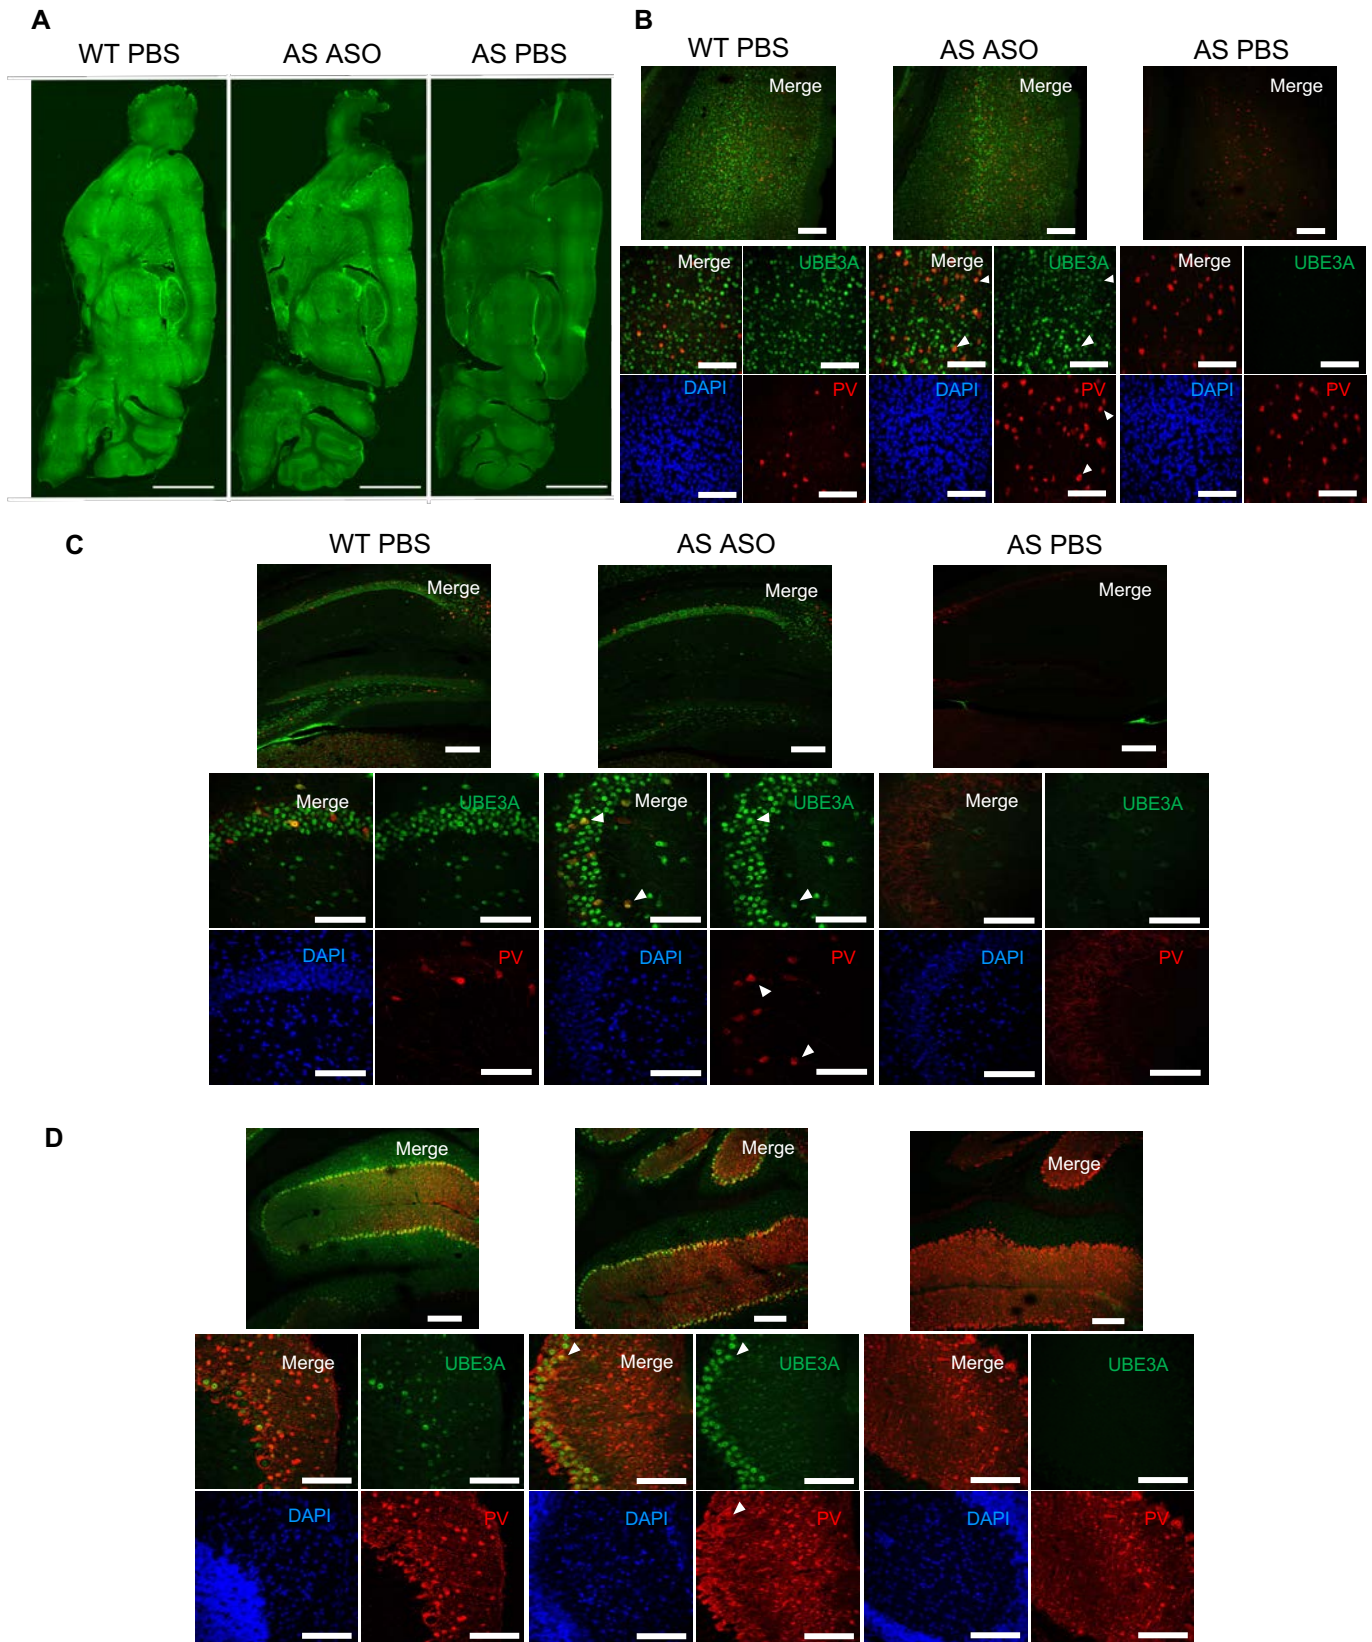

**Supplemental Figure 4: Reinstatement of UBE3A in ASO treated AS mice at P21 is not limited to glutamatergic neurons.** Three weeks post-P21 injection the brains (n=2) of WT-PBS, AS-ASO and AS-PBS injected mice were stained for UBE3A (green). (A) The brain of AS mice treated with ASO shows wide spread UBE3A reinstatement compared to the untreated AS brain. (B-D) the cortex (B) hippocampus (C) and cerebellum (D) of WT-PBS, AS-ASO and AS-PBS mice were stained for UBE3A (green), for parvalbumin (PV) (red) and counterstained for DAPI (blue). Scale bars, 2000  $\mu$ m (A), top panel 200  $\mu$ m, lower two panels 100  $\mu$ m (B-D). Arrows point at cells positive for both parvalbumin and UBE3A.

**Supplemental Table 1: Summary of the statistical tests.**

|                  | Behavioral test             | Dependent variable        | Normality Test                  | Sample N   | Test statistic | p value       | Test statistic               | Directionality     | Independent variable    | Test statistic value (df) | p value F test | Post-hoc test     | Comparison        | Adjusted p-value |
|------------------|-----------------------------|---------------------------|---------------------------------|------------|----------------|---------------|------------------------------|--------------------|-------------------------|---------------------------|----------------|-------------------|-------------------|------------------|
| P1 injected mice | rotarod                     | latency to fall (s)       | Shapiro-Wilk test               | AS ASO =16 | W: 0.950       | 0.735         | 2-way repeated measure ANOVA | 2-sided            | Genotype-Treatment      | F (2,43)=14.339           | <0.0001        | Tukey             | AS ASO vs. AS PBS | 0.100            |
|                  |                             |                           |                                 | AS PBS =16 | W: 0.971       | 0.881         |                              | 2-sided            | Time                    | F (2,9, 124.7) = 0.799    | 0.49           |                   | AS ASO vs. WT PBS | 0.005            |
|                  |                             |                           |                                 | WT PBS =14 | W: 0.946       | 0.708         |                              | 2-sided            | Genotype-Treatment*Time | F (5,8, 124.7) = 1.375    | 0.23           |                   | AS PBS vs. WT PBS | <0.0001          |
|                  |                             |                           |                                 |            |                |               |                              |                    |                         |                           |                |                   |                   |                  |
|                  | open field                  | distance moved (cm)       | D'Agostino & Pearson            | AS ASO =16 | K2: 2.893      | 0.235         | Univariate ANOVA             | 2-sided            | Genotype-Treatment      | F (2, 43) = 8.824         | <0.001         | Bonferroni        | AS ASO vs. AS PBS | 0.003            |
|                  |                             |                           |                                 | AS PBS =16 | K2: 1.723      | 0.422         |                              |                    |                         |                           |                |                   | AS ASO vs. WT PBS | >0.999           |
|                  |                             |                           |                                 | WT PBS =14 | K2: 0.168      | 0.919         |                              |                    |                         |                           |                |                   | AS PBS vs. WT PBS | 0.002            |
|                  | marble burying              | % buried marbles          | D'Agostino & Pearson            | AS ASO =16 | K2: 3.519      | 0.172         | Univariate ANOVA             | 2-sided            | Genotype-Treatment      | F (2, 42) = 24.05         | <0.0001        | Bonferroni        | AS ASO vs. AS PBS | 0.66             |
|                  |                             |                           |                                 | AS PBS =16 | K2: 4.971      | 0.083         |                              |                    |                         |                           |                |                   | AS ASO vs. WT PBS | <0.0001          |
|                  |                             |                           |                                 | WT PBS =15 | K2: 3.935      | 0.140         |                              |                    |                         |                           |                |                   | AS PBS vs. WT PBS | <0.0001          |
|                  | nest building               | used nesting material (%) | Shapiro-Wilk test               | AS ASO =16 | W: 0.966       | p=0.85        | 2-way repeated measure ANOVA | 2-sided            | Genotype-Treatment      | F (2, 42) = 16.64         | <0.0001        | Tukey             | AS ASO vs. AS PBS | 0.783            |
|                  |                             |                           |                                 | AS PBS =16 | W: 0.977       | p=0.919       |                              | 2-sided            | Time                    | F (4, 168) = 150.4        | <0.0001        |                   | AS ASO vs. WT PBS | <0.0001          |
|                  |                             |                           |                                 | WT PBS =14 | W: 0.981       | p=0.939       |                              | 2-sided            | Genotype-Treatment*Time | F (8, 168) = 9.795        | <0.0001        |                   | AS PBS vs. WT PBS | <0.0001          |
|                  |                             |                           |                                 |            |                |               |                              |                    |                         |                           |                |                   |                   |                  |
|                  | forced swim test            | floating time (%)         | D'Agostino & Pearson            | AS ASO =16 | K2: 8.168      | 0.017         | kruskal-wallis               | 2-sided            | Genotype-Treatment      | H(2,43)=15.94             | 0.0003         | Dunn's            | AS ASO vs. AS PBS | 0.002            |
|                  |                             |                           |                                 | AS PBS =16 | K2: 31.86      | <0.0001       |                              |                    |                         |                           |                |                   | AS ASO vs. WT PBS | >0.999           |
|                  |                             |                           |                                 | WT PBS =14 | K2: 3.393      | 0.183         |                              |                    |                         |                           |                |                   | AS PBS vs. WT PBS | 0.002            |
|                  | reverse rotarod             | latency to fall (s)       |                                 | AS ASO =17 |                |               | 2-way repeated measure ANOVA | 2-sided            | Genotype-Treatment      | F (2, 63) = 15.48         | <0.0001        | Tukey             | AS ASO vs. AS PBS | 0.038            |
|                  |                             |                           |                                 | AS PBS =30 |                |               |                              | 2-sided            | Time                    | F (4, 252) = 90.00        | <0.0001        |                   | AS ASO vs. WT PBS | 0.0321           |
|                  |                             |                           |                                 | WT PBS =19 |                |               |                              | 2-sided            | Genotype-Treatment*Time | F (8, 252) = 3.826        | 0.0003         |                   | AS PBS vs. WT PBS | <0.0001          |
|                  |                             |                           |                                 |            |                |               |                              |                    |                         |                           |                |                   |                   |                  |
|                  | brain weight                | weight (g)                | Shapiro-Wilk test               | AS ASO =8  | W: 0.902       | 0.3014        | Univariate ANOVA             | 2-sided            | Genotype-Treatment      | F (2, 20) = 11.69         | 0.0004         | Tukey             | AS ASO vs. AS PBS | 0.1062           |
|                  |                             |                           |                                 | AS PBS =7  | W: 0.918       | 0.4564        |                              |                    |                         |                           |                |                   | AS ASO vs. WT PBS | 0.0311           |
|                  |                             |                           |                                 | WT PBS =8  | W: 0.942       | 0.6293        |                              |                    |                         |                           |                |                   | AS PBS vs. WT PBS | 0.0003           |
|                  | Induced Audiogenic Seizures | Seizures (%)              |                                 | AS ASO =10 |                |               | Fisher Test                  | 2-sided            | Treatment               | AS PBS vs AS ASO          | 0.0001         |                   |                   |                  |
|                  | AS PBS =6                   |                           |                                 |            |                |               |                              |                    |                         |                           |                |                   |                   |                  |
|                  |                             |                           | WT PBS =7                       |            |                |               |                              |                    |                         |                           |                |                   |                   |                  |
| LTP              | fEPSP slope (% of baseline) | -                         | AS ASO = 16/8 (slice per mouse) |            |                | Two-way ANOVA | 2-sided                      | Genotype-Treatment | F (2, 39) = 3.56        | 0.038                     | Bonferroni     | AS ASO vs. AS PBS | 0.065             |                  |

|  |  |  |  |                                  |  |  |  |  |  |  |  |                   |       |
|--|--|--|--|----------------------------------|--|--|--|--|--|--|--|-------------------|-------|
|  |  |  |  | AS PBS = 13/16 (slice per mouse) |  |  |  |  |  |  |  | AS ASO vs. WT PBS | 1.0   |
|  |  |  |  | WT PBS = 13/6 (slice per mouse)  |  |  |  |  |  |  |  | AS PBS vs. WT PBS | 0.089 |

| P21 injected mice | Behavioral test             | Dependent variable          | Normality Test | Sample N                                                                                              | Test statistic   | p value        | Test statistic       | Directionality            | Independent variable | Test statistic value (df) | p value F test    | Post-hoc test    | Comparison        | Adjusted p-value |
|-------------------|-----------------------------|-----------------------------|----------------|-------------------------------------------------------------------------------------------------------|------------------|----------------|----------------------|---------------------------|----------------------|---------------------------|-------------------|------------------|-------------------|------------------|
|                   | Induced Audiogenic Seizures | Seizures (%)                |                | AS ASO =13<br>AS PBS =10<br>WT PBS =9                                                                 |                  |                | Fisher Test          | 2-sided                   | Treatment            | AS PBS vs AS ASO          | <0.0001           |                  |                   |                  |
|                   | LTP                         | fEPSP slope (% of baseline) | -              | AS ASO = 27/7 (slice per mouse)<br>AS PBS = 26/5 (slice per mouse)<br>WT PBS = 23/4 (slice per mouse) |                  |                | Two-way ANOVA        | 2-sided                   | Genotype-Treatment   | F (2, 73) = 3.56          | 0.018             | Bonferroni       | AS ASO vs. AS PBS | 0.471            |
|                   |                             |                             |                |                                                                                                       |                  |                |                      |                           |                      |                           |                   |                  | AS ASO vs. WT PBS | 0.371            |
|                   |                             |                             |                |                                                                                                       |                  |                |                      |                           |                      |                           |                   |                  | AS PBS vs. WT PBS | 0.014            |
|                   | Western Blot                | Dependent variable          | Normality Test | Sample N                                                                                              | Test statistic   | Directionality | Independent variable | Test statistic value (df) | p value F test       | Post-hoc test             | Comparison        | Adjusted p-value |                   |                  |
|                   | Cortex                      | UBE3A (%)                   | N too small    | AS ASO = 3                                                                                            | Univariate ANOVA | 2-sided        | Genotype-Treatment   | F (2, 6) = 21.38          | 0.002                | Tukey                     | AS ASO vs. AS PBS | 0.028            |                   |                  |
|                   |                             |                             |                | AS PBS = 3                                                                                            |                  |                |                      |                           |                      |                           | AS ASO vs. WT PBS | 0.055            |                   |                  |
|                   |                             |                             |                | WT PBS = 3                                                                                            |                  |                |                      |                           |                      |                           | AS PBS vs. WT PBS | 0.002            |                   |                  |
|                   | Hippocampus                 |                             |                | AS ASO = 3                                                                                            |                  |                |                      | F (2, 6) = 75.53          | <0.0001              | Tukey                     | AS ASO vs. AS PBS | 0.003            |                   |                  |
|                   |                             |                             |                | AS PBS = 3                                                                                            |                  |                |                      |                           |                      |                           | AS ASO vs. WT PBS | 0.002            |                   |                  |
|                   |                             |                             |                | WT PBS = 3                                                                                            |                  |                |                      |                           |                      |                           | AS PBS vs. WT PBS | <0.0001          |                   |                  |
|                   | Striatum                    |                             |                | AS ASO = 3                                                                                            |                  |                |                      | F (2, 6) = 9.38           | <0.0002              | Tukey                     | AS ASO vs. AS PBS | 0.024            |                   |                  |
|                   |                             |                             |                | AS PBS = 3                                                                                            |                  |                |                      |                           |                      |                           | AS ASO vs. WT PBS | 0.988            |                   |                  |
|                   |                             |                             |                | WT PBS = 3                                                                                            |                  |                |                      |                           |                      |                           | AS PBS vs. WT PBS | 0.020            |                   |                  |
|                   | Cerebellum                  |                             |                | AS ASO = 2                                                                                            |                  |                |                      | F (2, 4) = 107.2          | 0.0003               | Tukey                     | AS ASO vs. AS PBS | 0.011            |                   |                  |
|                   |                             |                             |                | AS PBS = 2                                                                                            |                  |                |                      |                           |                      |                           | AS ASO vs. WT PBS | 0.001            |                   |                  |
| WT PBS = 2        |                             |                             |                | AS PBS vs. WT PBS                                                                                     |                  |                |                      |                           |                      |                           | 0.0003            |                  |                   |                  |
